# Supplementary material for: Structural Racism, Mass Incarceration, and Racial and Ethnic Disparities in Severe Maternal Morbidity
Source: PubMed Central journal article supplement (PMC10818215; doi:10.1001/jamanetworkopen.2023.53626), 2024-01-26
Supplement: jamanetwopen-e2353626-s001.pdf [file jamanetwopen-e2353626-s001.pdf]

## Supplementary Online Content

Hailu EM, Riddell CA, Bradshaw PT, Ahern J, Carmichael SL, Mujahid MS. Structural racism, mass incarceration, and racial and ethnic disparities in severe maternal morbidity. *JAMA Netw Open*. 2024;7(1):e2353626. doi:10.1001/jamanetworkopen.2023.53626

**eFigure.** Study Sample Inclusion Flowchart

**eTable 1.** Associations Between Black-White Inequity in County Jail Incarceration Rates and Severe Maternal Morbidity Accounting for Temporal Trends, California 1997-2018

**eTable 2.** Associations Between Black-White Inequity in County Jail Incarceration Rates and Non-Blood Transfusion Severe Maternal Morbidity, California 1997-2018

**eTable 3.** Associations Between Black-White Inequity in County Jail Incarceration Rates and Severe Maternal Morbidity (including blood transfusion-only cases), California 1997-2018

This supplementary material has been provided by the authors to give readers additional information about their work.

eFigure 1: Study Sample Inclusion Flowchart

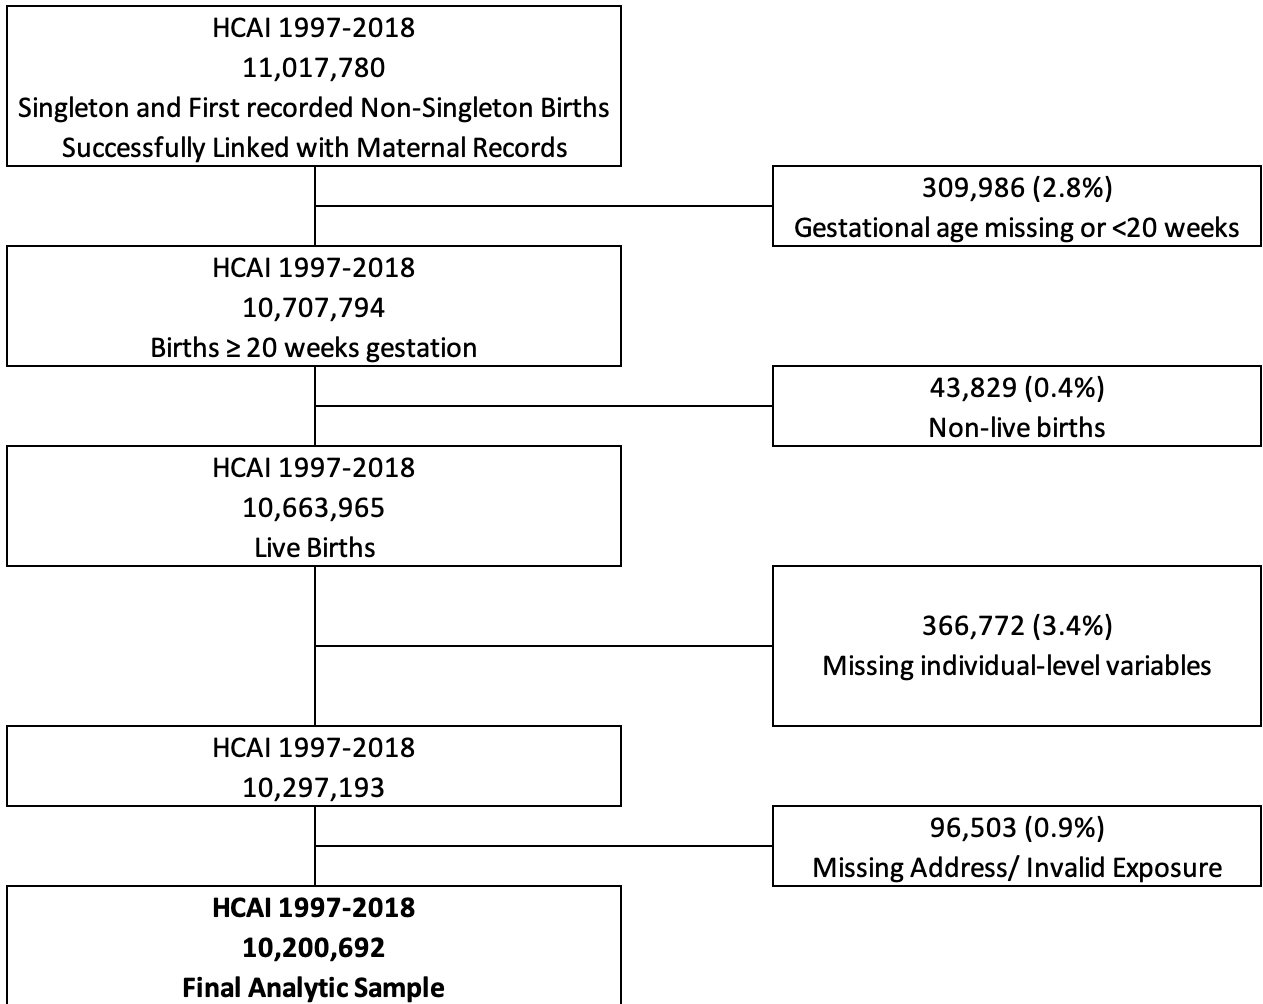

\*HCAI: Department of Health Care Access and Information. HCAI linked vital statistics records with maternal birth hospitalization discharge records

eTable 1: Associations between Black-White Inequity in County Jail Incarceration Rates and Severe Maternal Morbidity Accounting for Temporal Trends, California 1997-2018.<sup>a</sup>

|                                                                           | <i>American Indian or Alaska Native</i><br>(N=43,254) | <i>Asian or Pacific Islander</i><br>(N=1,369,170) | <i>Black</i><br>(N=589,692) | <i>Hispanic or Latinx</i><br>(N=5,177,325) | <i>White</i><br>(N=3,014,652) | <i>Multiracial or other<sup>b</sup></i><br>(N=6,599) |
|---------------------------------------------------------------------------|-------------------------------------------------------|---------------------------------------------------|-----------------------------|--------------------------------------------|-------------------------------|------------------------------------------------------|
|                                                                           | OR (95% CI)                                           | OR (95% CI)                                       | OR (95% CI)                 | OR (95% CI)                                | OR (95% CI)                   | OR (95% CI)                                          |
| <b>Non-blood transfusion severe maternal morbidity</b>                    |                                                       |                                                   |                             |                                            |                               |                                                      |
| Black-White Inequity in County Jail Incarceration Rates                   |                                                       |                                                   |                             |                                            |                               |                                                      |
| Tertile 1 (Low inequity)                                                  | 1 [Reference]                                         | 1 [Reference]                                     | 1 [Reference]               | 1 [Reference]                              | 1 [Reference]                 | NE <sup>c</sup>                                      |
| Tertile 2                                                                 | 0.89 (0.60, 1.32)                                     | 0.94 (0.79, 1.11)                                 | 1.06 (0.94, 1.20)           | 1.05 (0.98, 1.13)                          | 0.97 (0.89, 1.06)             | NE                                                   |
| Tertile 3 (High inequity)                                                 | 0.96 (0.65, 1.42)                                     | 0.87 (0.73, 1.04)                                 | 1.14 (1.01, 1.29)           | 1.09 (1.01, 1.18)                          | 0.94 (0.86, 1.03)             | NE                                                   |
| <b>Severe maternal morbidity (including blood transfusion-only cases)</b> |                                                       |                                                   |                             |                                            |                               |                                                      |
| Black-White Inequity in County Jail Incarceration Rates                   |                                                       |                                                   |                             |                                            |                               |                                                      |
| Tertile 1 (Low inequity)                                                  | 1 [Reference]                                         | 1 [Reference]                                     | 1 [Reference]               | 1 [Reference]                              | 1 [Reference]                 | 1 [Reference]                                        |
| Tertile 2                                                                 | 0.84 (0.66, 1.07)                                     | 0.95 (0.84, 1.09)                                 | 1.02 (0.88, 1.19)           | 0.96 (0.92, 1.01)                          | 0.97 (0.91, 1.03)             | 0.81 (0.37, 1.76)                                    |
| Tertile 3 (High inequity)                                                 | 0.89 (0.68, 1.16)                                     | 0.94 (0.82, 1.07)                                 | 1.01 (0.86, 1.19)           | 0.99 (0.93, 1.04)                          | 0.95 (0.89, 1.01)             | 0.88 (0.43, 1.77)                                    |

<sup>a</sup> Estimates are from mixed effects regression models with random intercepts for counties and year fixed effects, adjusting for maternal age, education, insurance, and county median household income

<sup>b</sup> Multiracial or other category includes individuals who self-identified with at least 2 or more racial groups and those who self-identified as “other” race/ethnicity

<sup>c</sup> NE=not estimable due to high instability given low sample sizes

eTable 2: Associations between Black-White Inequity in County Jail Incarceration Rates and Non-blood Transfusion Severe Maternal Morbidity, California 1997-2018. <sup>a</sup>

|                                                | <i>American Indian or Alaska Native</i><br>(N=43,254) | <i>Asian or Pacific Islander</i><br>(N=1,369,170) | <i>Black</i><br>(N=589,692) | <i>Hispanic or Latinx</i><br>(N=5,177,325) | <i>White</i><br>(N=3,014,652) | <i>Multiracial or other<sup>b</sup></i><br>(N=6,599) |
|------------------------------------------------|-------------------------------------------------------|---------------------------------------------------|-----------------------------|--------------------------------------------|-------------------------------|------------------------------------------------------|
|                                                | OR (95% CI)                                           | OR (95% CI)                                       | OR (95% CI)                 | OR (95% CI)                                | OR (95% CI)                   | OR (95% CI)                                          |
| <b>Black-White Jail Incarceration Inequity</b> |                                                       |                                                   |                             |                                            |                               |                                                      |
| Tertile 1 (Low inequity)                       | 1 [Reference]                                         | 1 [Reference]                                     | 1 [Reference]               | 1 [Reference]                              | 1 [Reference]                 | 1 [Reference]                                        |
| Tertile 2                                      | 0.90 (0.61, 1.32)                                     | 0.94 (0.79, 1.11)                                 | 1.08 (0.95, 1.23)           | 1.14 (1.06, 1.22)                          | 1.03 (0.94, 1.12)             | 1.22 (0.38, 3.87)                                    |
| Tertile 3 (High inequity)                      | 0.97 (0.66, 1.43)                                     | 0.95 (0.80, 1.13)                                 | 1.14 (1.01, 1.29)           | 1.24 (1.14, 1.34)                          | 1.02 (0.93, 1.12)             | 0.96 (0.33, 2.79)                                    |
| <b>Maternal age, y</b>                         |                                                       |                                                   |                             |                                            |                               |                                                      |
| <20                                            | 1 [Reference]                                         | 1 [Reference]                                     | 1 [Reference]               | 1 [Reference]                              | 1 [Reference]                 | 1 [Reference]                                        |
| 20-34                                          | 0.84 (0.57, 1.25)                                     | 1.33 (1.10, 1.62)                                 | 1.24 (1.13, 1.37)           | 0.92 (0.88, 0.95)                          | 1.16 (1.06, 1.28)             | 0.77 (0.26, 2.28)                                    |
| ≥35                                            | 1.78 (1.13, 2.82)                                     | 2.40 (1.97, 2.92)                                 | 2.10 (1.88, 2.35)           | 1.59 (1.52, 1.66)                          | 1.81 (1.64, 1.99)             | 1.16 (0.34, 3.89)                                    |
| <b>Maternal education</b>                      |                                                       |                                                   |                             |                                            |                               |                                                      |
| High school or less                            | 0.95 (0.62, 1.43)                                     | 0.99 (0.93, 1.06)                                 | 1.00 (0.92, 1.09)           | 0.97 (0.93, 1.02)                          | 1.00 (0.95, 1.04)             | 0.99 (0.43, 2.32)                                    |
| Some college                                   | 1.09 (0.72, 1.64)                                     | 1.01 (0.95, 1.07)                                 | 1.00 (0.92, 1.09)           | 1.02 (0.97, 1.07)                          | 1.02 (0.98, 1.07)             | 0.82 (0.34, 1.97)                                    |
| College graduate                               | 1 [Reference]                                         | 1 [Reference]                                     | 1 [Reference]               | 1 [Reference]                              | 1 [Reference]                 | 1 [Reference]                                        |
| <b>Insurance</b>                               |                                                       |                                                   |                             |                                            |                               |                                                      |
| Private                                        | 1 [Reference]                                         | 1 [Reference]                                     | 1 [Reference]               | 1 [Reference]                              | 1 [Reference]                 | 1 [Reference]                                        |
| Public/government                              | 1.04 (0.79, 1.36)                                     | 1.07 (1.00, 1.13)                                 | 1.15 (1.08, 1.22)           | 1.05 (1.02, 1.08)                          | 1.18 (1.13, 1.24)             | 2.06 (1.01, 4.22)                                    |
| Other/unknown/uninsured                        | 0.45 (0.14, 1.44)                                     | 0.72 (0.65, 0.79)                                 | 1.05 (0.87, 1.26)           | 0.94 (0.86, 1.02)                          | 1.08 (0.96, 1.22)             | 1.2 (0.16, 9.22)                                     |
| <b>County Median Household Income</b>          |                                                       |                                                   |                             |                                            |                               |                                                      |
| Quartile 1 (Low)                               | 0.95 (0.60, 1.49)                                     | 0.83 (0.66, 1.03)                                 | 0.71 (0.57, 0.89)           | 0.98 (0.86, 1.12)                          | 0.93 (0.83, 1.04)             | 0.79 (0.09, 6.84)                                    |
| Quartile 2                                     | 0.71 (0.42, 1.17)                                     | 0.76 (0.64, 0.91)                                 | 0.74 (0.63, 0.86)           | 0.97 (0.86, 1.10)                          | 0.99 (0.88, 1.11)             | 0.58 (0.07, 5.04)                                    |
| Quartile 3                                     | 1.06 (0.73, 1.54)                                     | 1.05 (0.92, 1.20)                                 | 0.91 (0.84, 1.00)           | 1.06 (0.94, 1.19)                          | 1.10 (1.00, 1.22)             | 2.33 (0.96, 5.66)                                    |
| Quartile 4 (High)                              | 1 [Reference]                                         | 1 [Reference]                                     | 1 [Reference]               | 1 [Reference]                              | 1 [Reference]                 | 1 [Reference]                                        |

<sup>a</sup> Estimates are from mixed effects regression models with random intercepts for counties, adjusting for maternal age, education, insurance, and county median household income

<sup>b</sup> Multiracial or other category includes individuals who self-identified with at least 2 or more racial groups and those who self-identified as “other” race/ethnicity

eTable 3: Associations between Black-White Inequity in County Jail Incarceration Rates and Severe Maternal Morbidity (including blood transfusion-only cases), California 1997-2018.<sup>a</sup>

|                                                | American Indian or Alaska Native<br>(N=43,254) | Asian or Pacific Islander<br>(N=1,369,170) | Black<br>(N=589,692) | Hispanic or Latinx<br>(N=5,177,325) | White<br>(N=3,014,652) | Multiracial or other <sup>b</sup><br>(N=6,599) |
|------------------------------------------------|------------------------------------------------|--------------------------------------------|----------------------|-------------------------------------|------------------------|------------------------------------------------|
|                                                | OR (95% CI)                                    | OR (95% CI)                                | OR (95% CI)          | OR (95% CI)                         | OR (95% CI)            | OR (95% CI)                                    |
| <b>Black-White Jail Incarceration Inequity</b> |                                                |                                            |                      |                                     |                        |                                                |
| Tertile 1 (Low inequity)                       | 1 [Reference]                                  | 1 [Reference]                              | 1 [Reference]        | 1 [Reference]                       | 1 [Reference]          | 1 [Reference]                                  |
| Tertile 2                                      | 0.86 (0.67, 1.09)                              | 1.01 (0.88, 1.15)                          | 1.15 (0.99, 1.35)    | 1.11 (1.06, 1.16)                   | 1.08 (1.01, 1.15)      | 0.83 (0.38, 1.79)                              |
| Tertile 3 (High inequity)                      | 0.88 (0.67, 1.15)                              | 1.11 (0.96, 1.27)                          | 1.20 (1.01, 1.42)    | 1.20 (1.14, 1.27)                   | 1.09 (1.02, 1.17)      | 0.87 (0.43, 1.75)                              |
| <b>Maternal age, y</b>                         |                                                |                                            |                      |                                     |                        |                                                |
| <20                                            | 1 [Reference]                                  | 1 [Reference]                              | 1 [Reference]        | 1 [Reference]                       | 1 [Reference]          | 1 [Reference]                                  |
| 20-34                                          | 0.98 (0.77, 1.26)                              | 1.09 (0.97, 1.23)                          | 1.22 (1.15, 1.31)    | 0.85 (0.83, 0.88)                   | 1.07 (1.01, 1.14)      | 1.15 (0.49, 2.71)                              |
| ≥35                                            | 1.78 (1.32, 2.41)                              | 1.81 (1.61, 2.04)                          | 2.11 (1.96, 2.28)    | 1.28 (1.24, 1.32)                   | 1.59 (1.49, 1.70)      | 1.33 (0.51, 3.44)                              |
| <b>Maternal education</b>                      |                                                |                                            |                      |                                     |                        |                                                |
| High school or less                            | 1.12 (0.84, 1.50)                              | 0.93 (0.89, 0.97)                          | 1.05 (0.99, 1.12)    | 0.96 (0.93, 0.99)                   | 1.01 (0.98, 1.04)      | 1.14 (0.65, 2.01)                              |
| Some college                                   | 1.17 (0.87, 1.57)                              | 1.00 (0.97, 1.04)                          | 1.04 (0.97, 1.10)    | 1.04 (1.01, 1.08)                   | 1.01 (0.98, 1.04)      | 0.92 (0.51, 1.64)                              |
| College graduate                               | 1 [Reference]                                  | 1 [Reference]                              | 1 [Reference]        | 1 [Reference]                       | 1 [Reference]          | 1 [Reference]                                  |
| <b>Insurance</b>                               |                                                |                                            |                      |                                     |                        |                                                |
| Private                                        | 1 [Reference]                                  | 1 [Reference]                              | 1 [Reference]        | 1 [Reference]                       | 1 [Reference]          | 1 [Reference]                                  |
| Public/government                              | 1.25 (1.04, 1.50)                              | 1.16 (1.11, 1.20)                          | 1.28 (1.23, 1.34)    | 1.17 (1.15, 1.19)                   | 1.28 (1.24, 1.32)      | 1.5 (0.93, 2.41)                               |
| Other/unknown/uninsured                        | 1.14 (0.68, 1.90)                              | 0.91 (0.85, 0.97)                          | 1.22 (1.08, 1.38)    | 1.08 (1.02, 1.14)                   | 1.13 (1.04, 1.23)      | 1.5 (0.45, 4.95)                               |
| <b>County Median Household Income</b>          |                                                |                                            |                      |                                     |                        |                                                |
| Quartile 1 (Low)                               | 1.07 (0.79, 1.45)                              | 1.01 (0.82, 1.25)                          | 0.97 (0.77, 1.22)    | 1.31 (1.12, 1.53)                   | 1.06 (0.94, 1.18)      | 0.94 (0.31, 2.85)                              |
| Quartile 2                                     | 0.78 (0.55, 1.11)                              | 1.03 (0.85, 1.25)                          | 0.83 (0.67, 1.02)    | 1.21 (1.04, 1.40)                   | 1.06 (0.95, 1.18)      | 0.67 (0.22, 2.03)                              |
| Quartile 3                                     | 0.95 (0.72, 1.25)                              | 1.20 (1.01, 1.44)                          | 1.06 (0.87, 1.28)    | 1.35 (1.18, 1.55)                   | 1.19 (1.08, 1.31)      | 1.13 (0.69, 1.85)                              |
| Quartile 4 (High)                              | 1 [Reference]                                  | 1 [Reference]                              | 1 [Reference]        | 1 [Reference]                       | 1 [Reference]          | 1 [Reference]                                  |

<sup>a</sup> Estimates are from mixed effects regression models with random intercepts for counties, adjusting for maternal age, education, insurance, and county median household income

<sup>b</sup> Multiracial or other category includes individuals who self-identified with at least 2 or more racial groups and those who self-identified as “other” race/ethnicity
