# Supplementary material for: Structural Racism, Mass Incarceration, and Racial and Ethnic Disparities in Severe Maternal Morbidity
Source: PubMed Central journal article supplement (PMC10818215; doi:10.1001/jamanetworkopen.2023.53626), 2024-01-26
Supplement: jamanetwopen-e2353626-s002.pdf [file jamanetwopen-e2353626-s002.pdf]

## Data Sharing Statement

Hailu. Structural Racism, Mass Incarceration, and Racial and Ethnic Disparities in Severe Maternal Morbidity. *JAMA Netw Open*. Published January 26, 2024.  
doi:10.1001/jamanetworkopen.2023.53626

### Data

**Data available:** No
